1 **Morphological profiling of human T and NK lymphocytes identifies**

2 **actin-mediated control of the immunological synapse**

3

4 **Yolla German,<sup>1,2,3,4+</sup> Loan Vulliard,<sup>5+</sup> Aude Rubio,<sup>2,6</sup> Kaan Boztug,<sup>4,5,7,8</sup> Audrey Ferrand,<sup>2,6</sup>**

5 **Jörg Menche<sup>5</sup> and Loïc Dupré\*<sup>1,2,3,4</sup>**

6

7 <sup>1</sup>INSERM, UMR1043, Center for Pathophysiology of Toulouse Purpan, Toulouse, France;

8 <sup>2</sup>Toulouse III Paul-Sabatier University, Toulouse, France; <sup>3</sup>CNRS, UMR 5282, Toulouse,

9 France; <sup>4</sup>Ludwig Boltzmann Institute for Rare and Undiagnosed Diseases, Vienna, Austria;

10 <sup>5</sup>Research Center for Molecular Medicine of the Austrian Academy of Sciences, Vienna, Austria;

11 <sup>6</sup>INSERM, U1220, Digestive Health Research Institute (IRSD), Toulouse, France; <sup>7</sup>Department

12 of Pediatrics and Adolescent Medicine, Medical University of Vienna, Vienna, Austria; <sup>8</sup>St.

13 Anna Kinderspital and Children's Cancer Research Institute, Department of Pediatrics, Medical

14 University of Vienna, Vienna, Austria.

15

16 <sup>+</sup>Equal contribution authors

17 Correspondence:

18 Loïc Dupré, INSERM UMR1043 - CPTP, Purpan University Hospital,

19 1 place du Dr Baylac, 31300 Toulouse, France

20 e-mail: [loic.dupre@inserm.fr](mailto:loic.dupre@inserm.fr)

21

22

## 23 **Abbreviations**

- 24 Ab: antibodies, HCI: high-content imaging, IS: immunological synapse, PLL: poly-L-lysine,  
25 PID: primary immunodeficiency, TCR: T cell receptor.

26 **Abstract**

27 The detection and neutralization of infected cells and tumors by cytotoxic lymphocytes is a  
28 vital immune defense mechanism. The immunological synapse orchestrates the target  
29 recognition process and the subsequent cytotoxic activity. Here, we present an integrated  
30 experimental and computational strategy to systematically characterize the morphological  
31 properties of the immunological synapse of human cytotoxic lymphocytes. Our approach  
32 combines high-content imaging with an unbiased, data-driven identification of high-  
33 resolution morphological profiles. Such profiling discriminates with high accuracy  
34 immunological synapse perturbations induced by an array of actin drugs in both model cell  
35 lines and primary lymphocytes. It reveals inter-individual heterogeneity in lymphocyte  
36 morphological traits. Furthermore, it uncovers immunological synapse alterations in  
37 functionally defective CD8<sup>+</sup> T cells from immunodeficient patients carrying *ARPC1B*  
38 mutations. Our study thus provides a foundation for the application of morphological  
39 profiling as a powerful and scalable approach to monitor lymphocyte activation status in  
40 experimental and disease settings.

41

## 42 **Introduction**

43 The immunological synapse (IS) is a complex cellular structure that sets lymphocyte  
44 activation and function during encounter with antigen-presenting cells and target cells. The  
45 canonical IS is characterized by a symmetrical architecture consisting of concentric rings of  
46 F-actin and integrins, while the antigen receptors occupy a central position<sup>1,2</sup>. The  
47 lymphocyte spreading associated with IS assembly, as well as the molecular organization  
48 defining IS architecture, rely on actin cytoskeleton dynamics. In cytotoxic lymphocytes,  
49 including CD8<sup>+</sup> T cells and NK cells, the IS is particularly important because it sustains the  
50 polarized delivery of cytolytic molecules such as perforin and granzymes towards target  
51 cells<sup>3</sup>. Indeed, activation of the integrin LFA-1 via an inside-out signaling from the T-cell  
52 receptor (TCR) in T cells, and several stimulatory receptors in NK cells<sup>4-7</sup>, leads to the  
53 formation of a tight adhesive ring allowing confinement of the degranulation process.  
54 Additional layers of control of lytic granule delivery at the IS are their polarization via the  
55 orientation of the microtubule organizing center<sup>8,9</sup> and their restricted passage through  
56 pervasive actin cytoskeleton clearances<sup>10</sup>. Given the key events occurring at the IS, this  
57 structure is a window of choice to monitor lymphocyte activation and function. Indeed, the  
58 positioning and dynamic behavior of multiple receptors and signaling molecules have been  
59 characterized within the IS<sup>11</sup>, and alterations of the its architecture have been reported in  
60 multiple disease settings<sup>12,13</sup>. However, the various microscopy approaches employed so far  
61 to characterize spatial organization of the IS have remained low throughput and have been  
62 restricted to the analysis of a limited number of morphological features. A more systematic  
63 in-depth assessment of the IS would better exploit this structure as a pivotal read-out for the  
64 characterization of lymphocyte activation and function.

65 Recent advances in high content imaging (HCI) now allow for the profiling of cells at a much  
66 richer level of detail and in an unbiased fashion. It has therefore been widely employed in



67 cancer and toxicology research, in particular for screening drug effects on adherent cell lines  
68 and implementing genetic screens based on the siRNA, shRNA and CRISPR technologies<sup>14-</sup>  
69 <sup>17</sup>. However, HCI has not yet been applied to the study of leukocytes because of the difficulty  
70 to overcome the relatively poor adherence of these cells.

71 In this study, we report the implementation of an HCI approach that allows the high-  
72 resolution confocal imaging of T and NK cells stimulated over 2D surfaces functionalized  
73 with ICAM-1 and stimulatory antibodies, and the effect of pharmaceutical and genetic  
74 perturbations on the IS morphology. In addition to extracting a previously studied features  
75 related to staining of F-actin, LFA-1 and perforin, we develop an unbiased analytical  
76 approach allowing high-dimensional profiling and clustering of IS morphologies. Our data  
77 shows non-identical perturbations caused by drugs affecting different facets of actin  
78 cytoskeleton remodeling and highlights that actin cytoskeleton integrity is required not only  
79 for lymphocyte spreading but also for lytic granule polarization and LFA-1 distribution.  
80 Application of our HCI pipeline to lymphocytes isolated from human blood reveals distinct  
81 morphological profiles in individual healthy donors. Furthermore, our method allows  
82 characterizing synapse defects in untransformed CD8<sup>+</sup> T cells from ARPC1B-deficient  
83 patients, illustrating its potential to identify disease-related synapse alterations and to predict  
84 functional defects, such as cytotoxicity.

## 85 **Results**

### 86 **Morphological profiles of T cell and NK cell immunological synapses.**

87 In order to systematically analyze the morphological profile of lymphocyte populations, we  
88 here sought to develop an adapted HCI workflow. It consisted in seeding cells of interest on  
89 stimulatory surfaces in microwells of 96- or 384-well plates, fixation and staining with  
90 combinations of fluorescent dyes and antibodies. Confocal images were acquired on an Opera  
91 Phenix high-content screening system and analyzed with CellProfiler<sup>18</sup> to automatically  
92 segment individual cells and extract features pertaining to cell morphology and each of the  
93 fluorescent markers (**Fig. 1a**). As proof of concept, we first applied our approach to NK-92  
94 and Jurkat cells, two human cell lines commonly used as models for NK cells and T cells,  
95 respectively. Cell morphologies were compared upon interaction with a neutral poly-L-lysine  
96 (PLL) surface or co-stimulation with the LFA-1 ligand ICAM-1 and stimulatory antibodies  
97 (Ab) in order to evoke IS assembly. Upon co-stimulation with ICAM-1 and anti-NKp30 /  
98 NKp46 Ab, NK-92 cells spread, emitted F-actin-rich peripheral pseudopodia and polarized  
99 perforin-containing granules towards the center of the cell to substrate interface (**Fig. 1b** and  
100 **Fig. S1a**). These observations are in line with the characteristics of the IS from cytotoxic  
101 lymphocytes<sup>11,19</sup>, therefore validating our high-throughput stimulation and staining  
102 procedure. Based on literature describing the IS and reporting a polarization of F-actin and  
103 lytic granules in NK cells<sup>20-22</sup>, we first selected quantitative features pertaining to the F-actin  
104 and perforin stainings and extracted them as mean values per field of view averaged across 3  
105 experiments. We also included features related to the nucleus, available since the DAPI  
106 staining was used in a primary nucleus segmentation step before the identification of the  
107 cytoplasm around the nuclei (**Fig. 1c** and **Table S1**). Increase in F-actin intensity and cell  
108 area were prominent features of the stimulation, as compared to the PLL condition.  
109 Furthermore, the number of perforin-containing granules detected at the cell to substrate

110 interface increased upon stimulation, which is indicative of their polarization towards the IS.  
111 Interestingly, this polarization process was associated with a relative spreading of the area  
112 covered by lytic granules, supporting the notion of multiple docking domains at the  
113 synapse<sup>23</sup>. Our analysis also highlights that increase of nucleus area is a typical feature of the  
114 IS in the NK-92 cells. Interestingly, nucleus area appears to increase along with F-actin  
115 intensity when assessed across 3 experiments (**Fig. 1d**), suggesting that nucleus flattening and  
116 F-actin polymerization are related events, probably as components of the cell spreading  
117 mechanism. Of note, the absolute values for F-actin intensity were higher in one of the 3  
118 experiments, possibly resulting from differences in staining quality. This indicates that  
119 absolute value for staining intensities across experiments should be considered with caution.  
120 To further estimate morphological heterogeneity in individual cells, F-actin intensity was  
121 assessed on a per-cell basis (**Fig. 1e**), rather than on a per field of view basis. The unimodal  
122 increase of F-actin intensity driven by the stimulation of NK-92 cells indicates a relatively  
123 homogenous activation and IS assembly in these cells. It also validates our approach to  
124 consider mean cell measurements on a per field of view basis.

125 We then applied our HCI workflow to Jurkat cells, which were co-stimulated with ICAM-1  
126 and anti-CD3 Ab. We selected 12 features pertaining to the F-actin, LFA-1 and DAPI  
127 stainings to monitor hallmarks of the T cell IS<sup>11</sup>. As compared to the neutral PLL stimulation,  
128 LFA-1/CD3 co-stimulation led to cell spreading, assembly of a peripheral F-actin ring-like  
129 structure and redistribution of the integrin LFA-1 as an inner belt at the cell to substrate  
130 interface (**Fig. 1f** and **Fig. S1b**), which are characteristic for the IS<sup>11,24</sup>. Our quantification  
131 over multiple fields showed that similarly to NK-92 cells, F-actin intensity, cell area, LFA-1  
132 intensity and LFA-1 area are prominent features of the Jurkat cell IS (**Fig. 1g** and **Table S2**).  
133 Likewise, F-actin and LFA-1 intensities correlated in individual fields of view with a Pearson  
134 correlation coefficient of 0.50 (**Fig. 1h**). At the single cell level, F-actin clearly increased in

135 response to the ICAM-1 and anti-CD3 Ab stimulation, despite noticeable heterogeneity in  
136 both stimulated and unstimulated cells (**Fig. 1i**). When taken together, the data collected on  
137 the assembly of the IS in NK-92 and Jurkat cells highlight F-actin intensity rise and cell  
138 spreading as common traits. However, in line with the distinct appearance of their actin rich  
139 peripheral protrusions, Jurkat cells, but not NK-92 cells, became rounder upon activation.  
140 Furthermore, while NK-92 flattened their nucleus, the effect was not marked in Jurkat cells,  
141 indicating a distinct cell spreading behavior. Overall, our data validate the reliability and  
142 power of HCI with high spatial resolution to unbiasedly define the morphological profiles of  
143 lymphocytes in response to stimulatory regimens.

144

#### 145 **Cytoskeleton drugs induce non-identical alterations of the NK cell IS.**

146 Given the prominent actin remodeling activity sustaining IS assembly, we next exploited our  
147 HCI approach to monitor how pharmacological modulation of cytoskeletal dynamics would  
148 affect IS architecture. NK-92 cells were treated with seven drugs known to target distinct  
149 aspects of actin and acto-myosin dynamics, which were used at 3 concentrations in order to  
150 detect possible dose-dependent effects. NK-92 cells were pre-treated with drugs for 30  
151 minutes before seeding on ICAM-1 and anti-NKp30 / NKp46 Ab. In a first step, the effects of  
152 these drugs on the previously selected quantitative morphological features of the IS were  
153 assessed.

154 Upon treatment with Latrunculin B, which binds actin monomers and inhibits actin  
155 polymerization, a concentration-dependent decrease in F-actin intensity was detected as  
156 compared to the untreated control (**Fig. 2a**), in concordance with an expected reduction in  
157 actin polymerization. However, IS assembly was not fully impeded as revealed by a minor  
158 reduction of cell area. Remarkably, Latrunculin B treatment elicited an increase of the  
159 number of perforin granules and the area they occupied at the cell to substrate interface. This

160 might reflect impaired exocytosis and accumulation of aberrantly spread lytic granules at the  
161 IS. Such explanation is in agreement with the role of actin dynamics in facilitating the  
162 docking and exocytosis of lytic granules<sup>21,25</sup>. Upon treatment with Jasplakinolide, which  
163 stabilizes actin, a mild decrease in F-actin intensity was detected at 1  $\mu$ M, supporting the  
164 notion that actin turnover is required to fuel polymerization<sup>26,27</sup>(**Fig. 2b**). A higher  
165 concentration of 2.5  $\mu$ M was tested but could not be exploited because of its apparent  
166 detrimental effect on cell viability. In comparison to Latrunculin B, Jasplakinolide treatment  
167 elicited an increase in the perforin-related features, confirming that actin turnover is required  
168 for lytic granule exocytosis<sup>25,27</sup>. Treatment with the myosin inhibitor Blebbistatin induced a  
169 slight increase in F-actin intensity at 5 and 10  $\mu$ M (**Fig. 2c**). More strikingly it increased the  
170 number of granules detected at the synapse and the area they occupied, consistent with  
171 previous findings that Blebbistatin hinders granule exocytosis without affecting their  
172 polarization<sup>28,29</sup>. Treatment with the ROCK inhibitor Y-27632 affected F-actin intensity, cell  
173 area and lytic granule features similar to those elicited by Blebbistatin treatment (**Fig. 2d**), in  
174 agreement with the activity of ROCK as an upstream regulator of acto-myosin contractility.  
175 Upon CK-869 treatment, a concentration-dependent decrease in F-actin intensity was  
176 detected (**Fig. 2e**), showing, as expected, that ARP2/3 complex inhibition reduced actin  
177 polymerization<sup>30</sup>. Moreover, CK-869 treated cells displayed reduced radial spreading, as  
178 shown by decreased area and increased cell width to length ratio, indicative of a severe  
179 impairment of IS assembly. A distinct property of CK-869 treatment was a reduction in the  
180 number of and area covered by perforin granules, possibly reflecting the inability of CK-869  
181 treated cells to polarize lytic granules towards the stimulatory surface because of defective IS  
182 assembly. Upon treatment with Wiskostatin, an inhibitor of WASP, which drives ARP2/3-  
183 dependent actin branching, a slight increase in F-actin intensity was measured for the two  
184 lowest concentrations (**Fig. 2f**). In comparison with CK-869, Wiskostatin displayed minor

185 effects on perforin features. This suggests that the ARP2/3 activator WASP plays a limited  
186 role in the overall actin polymerization rate at the IS and in lytic granule polarization and  
187 secretion<sup>24,31</sup>. Treatment with the pan-formin blocker SMIFH2 led to a concentration-  
188 dependent increase in F-actin intensity (**Fig. 2g**). Low-concentration SMIFH2 treatment  
189 resulted in an increase in perforin intensity and area. Collectively, these data indicate that  
190 drugs affecting different facets of actin remodeling differentially altered the assembly of the  
191 NK cell IS.

192 To further assess whether the morphological alterations inflicted by the drugs could be  
193 distinguished one from another, we trained a random forest classifier based on the 13 selected  
194 features. The image set was split to carry out a parameter optimization and to validate the  
195 performance of the model. The obtained overall accuracy of 69% and  $F_1$  score of 0.7  
196 confirmed that our method performed relatively well at distinguishing the morphological  
197 effects of the actin drugs. The confusion matrix shows that most drugs were predicted with  
198 high accuracy based on the corresponding image features, while the morphological effects of  
199 Blebbistatin and Y-27632 could not be easily distinguished, in line with their highly related  
200 mechanism of action (**Fig. S2a**). It also confirmed F-actin intensity as a major discriminating  
201 feature and identified cell eccentricity and roundness as key features to account for the  
202 morphological alterations induced by the drugs (**Fig. S2b**).

203 Overall, our comparative image-based analysis of the effects of different drugs affecting actin  
204 and acto-myosin dynamics reveals that distinct effects on actin turnover and polymerization  
205 yield distinguishable IS morphologies but converge in affecting lytic granule positioning.  
206 This supports the notion that multiple actin-dependent steps control lytic granule docking and  
207 exocytosis<sup>32</sup>.

208

209

210 **High-resolution morphology profiling of NK cells upon drug treatment.**

211 To further enrich our morphological analysis of the IS in the context of drug treatment, we  
212 considered additional morphological features beyond the previously analyzed quantitative  
213 features. From 1898 measured features, a set of 383 features was retained following filtering  
214 of non-informative and redundant features. In order to visualize the information contained in  
215 this large feature set, as well as to quantify the significance of morphological changes upon  
216 drug treatment as compared to untreated cells, we applied a UMAP dimensionality reduction.  
217 This allows the visualization of all cell images, recapitulating in a ‘morphological space’ the  
218 relation between the morphology they display, by summarizing the variation of the 383  
219 features into two dimensions (**Fig. S2c**). By examining the relation between these features,  
220 we saw that both the different types of measurements acquired and the different biological  
221 objects studied provided complementary and non-redundant information about the global  
222 changes occurring between images and between treatments (**Fig. S2d**). This also showed that  
223 none of these morphological features were repeating technical confounders, such as  
224 experimental plate position effect or cell count. As clearly visible in the morphological space,  
225 images of cells treated with Latrunculin B, Jasplakinolide and CK-869 clustered away from  
226 the untreated cells and from one another, most likely owing to these drugs having prominent  
227 and distinct effects on the ability of NK-92 cells to assemble the IS (**Fig. 3a, b and e**). In  
228 comparison, morphologies of cells treated with Blebbistatin, Y-27632, Wiskostatin and  
229 SMIFH2 appeared to be less distinct from the untreated condition and to cluster at close  
230 vicinity to one another (**Fig. 3c, d, f and g**). The three concentrations assayed per treatment  
231 fell into distinct sub-clusters, clearly indicating dose-dependent effects, as detailed for CK-  
232 869 and SMIFH2 (**Fig. S2e and f**). All drug-evoked morphological profiles were found to be  
233 significantly distant from the untreated state. Indeed, the median robust Mahalanobis  
234 distances between the fields of view per treatment and their matching negative controls are

235 larger than expected at random (**Fig. S2g**)<sup>33,34</sup>. To get insight into the nature of the changes  
236 that are causative of the observed clusters on the UMAP representation, we trained a random  
237 forest classifier on the set of 383 features. This achieved a satisfactory performance, as shown  
238 on the confusion matrix (**Fig. 3h**) with an  $F_1$  score and an accuracy of 0.89 and 89%,  
239 respectively. The importance of each feature for the classification was proxied by the average  
240 increase in accuracy obtained by including the given feature in a decision tree. In particular,  
241 our analysis shows that CK-869 treatment mostly affected nucleus and cytoplasm shape  
242 descriptors (**Fig. 3i**), while SMIFH2 treatment altered radial intensity distributions in the  
243 cytoplasm (**Fig. 3j**). Only four features described intensities in the cytoplasm within our  
244 feature set. Interestingly, those few features were in average increasing the model accuracy  
245 the most, strengthening the necessity, but not sufficiency, of actin intensity measurements to  
246 profile the IS. Features pertaining to lytic granules also played a determinant role in  
247 reinforcing model accuracy, providing further evidence of a tight regulation of lytic granule  
248 distribution at the IS. Our data therefore demonstrates the ability of the unbiased profiling to  
249 identify relevant spatially localized events and characterize perturbed cell states with high-  
250 resolution power.

251

### 252 **Morphological profiling of primary human NK cells upon drug treatment.**

253 We next applied our HCI approach to assess the susceptibility of primary human  
254 lymphocytes from different donors to cytoskeletal drugs. For that purpose, NK cells were  
255 purified from the peripheral blood of three normal donors, treated with four concentrations of  
256 either CK-869 or SMIFH2, and stimulated with ICAM-1 and anti-NKp30 / NKp46 Ab (**Fig.**  
257 **4a**). Although the untreated cells from the three different healthy donors displayed variation  
258 in morphology, an actin-rich IS with the lytic granules concentrated in one area towards the  
259 cell periphery was observed upon stimulation. The four tested concentrations of CK-869



260 caused a marked decrease in F-actin intensity in the NK cells from the three donors,  
261 demonstrating the capacity of our approach to detect actin cytoskeleton alterations in primary  
262 lymphocytes. Notably, the area covered by the perforin granules, taken as an absolute value  
263 or divided by the cell area, was increased in the CK-869 treated NK cells from the three  
264 donors, showing a clear dose-dependent response (**Fig. 4b**). This effect is opposite to what  
265 was measured in the NK-92 cells, highlighting contrasting responses of model cell lines and  
266 primary cells. Moreover, the four tested concentrations of SMIFH2 also caused a decrease in  
267 F-actin intensity in the NK cells from the three donors, thereby highlighting the importance  
268 of formins for actin remodeling at the IS (**Fig. 4c**). SMIFH2 treatment also strongly affected  
269 the distribution of perforin granules. Interestingly, in NK cells from donors 1 and 2, a dose  
270 dependent reduction of both perforin granule number and covered area was observed, a  
271 response opposite to that to CK-869. In contrast with donors 1 and 2, low concentrations of  
272 SMIFH2 resulted in an increase of perforin granule number and covered area in NK cells  
273 from donor 3. It should be noted that lower number of perforin granules were detected in the  
274 untreated cells from this donor, possibly influencing the response to the tested drugs. Those  
275 observations highlight the potential of HCI to identify features underlying inter-donor  
276 variability upon stimulation and treatment of lymphocytes populations, which may be  
277 explained by the phenotypic variation of each donor's NK cells<sup>35</sup>. Together, the dataset  
278 collected on primary NK cells demonstrates that HCI is amenable to the morphological  
279 profiling of primary human lymphocytes in the context of drug treatments and that it can  
280 discriminate specific responses from individual donors.

281

282 **Immunological synapse defect is associated with impaired cytotoxicity in CD8<sup>+</sup> T cells**  
283 **from ARPC1B deficient patients.**

284 We then reasoned that the HCI approach might be adapted to characterizing lymphocyte  
285 impairments in the context of pathology. For that purpose, we implemented a morphological  
286 profiling of CD8<sup>+</sup> T cells isolated from two patients suffering from a primary  
287 immunodeficiency caused by mutations in *ARPC1B*, which encodes one subunit of the  
288 ARP2/3 complex. Cells from the two patients and three normal donors were stimulated with  
289 ICAM-1 and either 1 or 10 µg/ml anti-CD3 Ab, and stained for perforin and LFA-1, F-actin  
290 and the nucleus. Examination of representative images suggests that the CD8<sup>+</sup> T cells from  
291 both patients spread less than control cells and failed to assemble a typical IS (**Fig. 5a**).  
292 Analysis of 16 selected morphological features highlighted that F-actin intensity was  
293 decreased in T cells from the two patients, as compared to the cells from the normal donors,  
294 following stimulation with anti-CD3 Ab at both concentrations (**Fig. 5b** and **Fig. S3a**). This  
295 is comparable to the data collected above in cell lines and primary cells upon treatment with  
296 the ARP2/3 inhibitor CK-869. Cells from the two patients however displayed distinct  
297 morphological aberrations. While cell area was mostly affected in cells from patient 1,  
298 implying an impaired spreading ability, cell roundness was prominently decreased in patient  
299 2, most likely resulting from aberrant peripheral actin spikes. T cells from patient 2 displayed  
300 an increased number and dispersion of perforin granules, similarly with what we observed in  
301 primary NK cells treated with CK-869. However, fewer perforin granules were detected in T  
302 cells from patient 1. Their dispersion was reduced in absolute terms but increased when  
303 normalized for the cell area, the latter being reduced. LFA-1 intensity was increased in the T  
304 cells from both patients and LFA-1 was localized at the cell rim rather than at the cell to  
305 substrate contact area, suggesting abnormal distribution of adhesive forces. Our  
306 morphological profiling clearly establishes that CD8<sup>+</sup> T cells from the two considered

307 ARPC1B-deficient patients have severe impairments in IS assembly. The distinct synaptic  
308 alterations revealed by our approach in the two patients could not be explained by differences  
309 in the phenotype of the cells, which showed similar expression of CD8, perforin, LFA-1, and  
310 granzyme B (**Fig. S3 f-i**). To further enrich our analysis, we applied once more a UMAP  
311 approach to explore the morphological space, which evidenced a marked segregation of the  
312 two patients from the control donors, but also among each other (**Fig. 5c** and **Fig. S3b**). This  
313 analysis therefore reinforces the finding that patient T cells have aberrant synaptic traits and  
314 that the nature of these aberrations is distinct between the two patients. Interestingly, we  
315 noticed that even though the normal donors clustered closely to each other, donor 3 did not  
316 overlap with the other two at either anti-CD3 Ab concentration, confirming that heterogeneity  
317 in IS morphology exists among normal donors, as observed above for NK cells. A first  
318 random forest model showed that we could determine the concentration of anti-CD3 Ab used  
319 to stimulate the cells with an accuracy of 95% and  $F_1$  score of 0.95 (**Fig. S3c**), and indicated  
320 that IS assembly varied according to the concentration of anti-CD3 Ab (**Fig. S3d**). This was  
321 associated with changes in shape and radial distribution in the cytoplasm, while cytoplasm  
322 intensities were the most discriminative feature category in average, fitting a scenario in  
323 which TCR stimulation strength would differentially remodel the actin cytoskeleton and  
324 associated synapse morphology. A second model showed that our approach is powerful  
325 enough to distinguish patient cells from normal donor cells seeded on ICAM-1 and 10  $\mu\text{g/ml}$   
326 anti-CD3 Ab by achieving a perfect classification on a validation set (**Fig. 5d**), distinguishing  
327 ARPC1B deficient cells mostly on the basis of textural and intensity distribution changes  
328 within the cytoplasm (**Fig. 5e**). Moreover, some features changed not only between ARPC1B  
329 patients and normal donors but were as well discriminating between patient 1 and patient 2  
330 (**Fig. S3e**), further reinforcing that the two patients have distinct IS architectures. The  
331 aberrant IS characterized in the patients through the morphological profiling approach

332 alluded to a possible functional defect. We therefore assessed the cytotoxic activity of CD8<sup>+</sup>  
333 T cells towards anti-CD3 Ab-coated P815 target cells. Whereas, normal CD8<sup>+</sup> T cells started  
334 to kill target cells in four hours, CD8<sup>+</sup> T cells from the ARPC1B deficient patients failed to  
335 do so. The patient derived CD8<sup>+</sup> T cells remained defective at killing target cells over a  
336 prolonged 24-hour incubation (**Fig. 5f**). This indicates that the T cells from the patients most  
337 likely fail to secrete lytic molecules, despite a normal content in perforin and granzyme B  
338 (**Fig. S3g and i**). Our results therefore indicate that the defects in IS organization  
339 characterized in both patients are leading to a severe impairment of the cytotoxic activity.

## 340 **Discussion**

341 By combining automated cell imaging with computational image analysis pipelines, HCI  
342 provides novel opportunities to systematically analyze cellular mechanisms<sup>15,36,37</sup>. However,  
343 the potential of such approach has not yet been explored for the study of immune cells. We  
344 here tailor a HCI approach for the high-resolution morphological profiling of various human  
345 cytotoxic lymphocyte population, and focus on the imaging of the IS as a mean to capture the  
346 activation state and effector potential of these cells. We validate our HCI approach by  
347 identifying distinct morphological signatures evoked by a panel of actin-targeting drugs. We  
348 further reveal the power of our HCI approach to discriminate individual donors on the basis  
349 of immune cell morphological traits. We also exemplify the clinical applicability of such  
350 approach by identifying cytotoxic lymphocyte aberrations in patients with a severe congenital  
351 immunodeficiency.

352 Although we use a minimalistic 2D static approach based on the adsorption of stimulatory  
353 molecules on the surface microwells, it proves to robustly stimulate the assembly of  
354 morphological structures qualifying as IS. We show that various human lymphocyte  
355 populations, including model cell lines, cells freshly isolated from the blood, as well as  
356 expanded primary cells can be stained and imaged with an automated confocal microscope at  
357 high resolute power in a 384-well format, allowing the analysis of several samples,  
358 activation conditions and perturbations in parallel. Computationally, we use robust statistics  
359 and work at an image-level resolution, typically gathering a few dozens of cells imaged over  
360 four z planes representing the 2- $\mu$ m section of the cells most proximal to the stimulatory  
361 substrate. While most morphological profiling studies have been limited to average profiles  
362 over wells or replicates<sup>14,37,38</sup>, a few approaches have defined profiles based on single cells  
363<sup>39,40</sup>. We here rather consider the variability in morphology displayed in each image by  
364 including measures of dispersion that are proven to be beneficial for morphological profiles

365 and could potentially be further improved by adding a higher order joint statistical moment<sup>41</sup>.  
366 From an analytical point of view, we elaborate two complementary methods. First, we focus  
367 on a pre-defined set of morphological features based on prior knowledge and including cell  
368 and nucleus shape parameters as well as intensities of F-actin, LFA-1 and perforin at the  
369 synaptic plane. We show that such method can be applied to relatively low numbers of  
370 images and provides meaningful identification of discriminative features when comparing  
371 experimental conditions. Second, we implement a high-resolution and unbiased  
372 morphological profiling pipeline, from which novel relevant features can be identified and  
373 from which high-performance classifiers can be trained to discriminate cell states  
374 corresponding to different stimulations, drug treatments or genetic defects.

375 Beyond the methodological advance provided in this study, we present data relevant to the  
376 understanding of lymphocyte activation in both a fundamental and medically relevant  
377 perspective. Among the pre-defined set of morphological features, we identify increase of F-  
378 actin as a hallmark of T and NK lymphocyte stimulation by combinations of ICAM-1 and  
379 antibodies directed against CD3 or NK receptors, respectively. This is in line with the  
380 previously established role of the actin cytoskeleton in driving the cell spreading behavior  
381 supporting IS assembly<sup>42,43</sup>. The further investigation of the role of actin cytoskeleton  
382 remodeling by the treatment of NK cells with a drug array reveals distinct morphological  
383 alterations upon targeting actin polymerization, depolymerization and myosin II. Our data  
384 also point to converging morphologies induced by some of the drugs with distinct modes of  
385 action, possibly related to a limited number of configurations of the cytoskeleton, as recently  
386 described in an adherent neuroblastoma cell line<sup>36,44</sup>. Strikingly, most tested drugs yield  
387 prominent alteration of the distribution of perforin-containing granules, indicating that the  
388 different facets of actin cytoskeleton dynamics are all important to regulate the polarized  
389 delivery of lytic granules at the IS<sup>25,45</sup>.

390 Owing to the distinct morphological profiles observed for each drug, and the detection of  
391 dose-dependent effects, both in cell lines and primary cells, such an approach could be  
392 applied in the context of immunotherapeutic drugs. A striking finding of the application of  
393 morphological profiling to lymphocyte populations is that it reveals a previously  
394 unappreciated level of heterogeneity in cellular morphological traits among individuals.  
395 When considering the data pertaining to the NK cells freshly isolated from the blood, we  
396 cannot rule out that morphological differences arise from distinct activation states of the cells  
397 from different donors. However, in vitro stimulation and expansion of T lymphocytes, which  
398 is expected to robustly drive cells towards a differentiated phenotype<sup>46</sup>, was also associated  
399 with distinct morphological traits. Further analysis of larger cohorts of donors and sorted  
400 subpopulations of lymphocytes will be required to precisely appreciate the degree of  
401 morphological heterogeneity among individuals and lymphocyte subsets. The detection of  
402 distinct morphological profiles among healthy individuals certainly highlights the extreme  
403 sensitivity of the HCI approach to characterize and compare cell populations. A further  
404 illustration of this property is provided by the characterization of IS alterations in T  
405 lymphocyte populations isolated from 2 patients with ARPC1B deficiency. Interestingly,  
406 again, our approach points to distinct morphological alterations in the cells from the 2  
407 patients considered. Such differences might be inherent to the severity of the ARPC1B  
408 genetic defect.<sup>47,48</sup> The study of larger cohorts of patients, which would be compatible with  
409 the herein developed approach, would be required to answer such question.

410 CD8<sup>+</sup> T cells from ARPC1B patients display an aberrant IS morphology including defects  
411 pertaining to the distribution of perforin granules and LFA-1. Comparably to other studies,  
412 we show a reduced cell area and a failure to spread radially and emit lamellipodia upon TCR  
413 stimulation<sup>47</sup>. The lack of lamellipodia formation was also observed upon NK-92 and primary  
414 NK cell treatment with CK-869. Our data reveals increased accumulation of lytic granules at

415 the IS for one patient, which could indicate a defect in granule exocytosis, opposed to a  
416 decrease in perforin related parameters for the other patient, most likely indicative of failed  
417 lytic granule polarization. These observations are in agreement with a recent study showing  
418 defective lytic granule polarization and degranulation in ARPC1B deficient CD8<sup>+</sup> T cells<sup>49</sup>.  
419 The detection of such IS defects is suggestive of a possible alteration of the cytotoxic activity.  
420 Our data shows that ARPC1B deficient cells fail to eliminate target cells, as recently  
421 reported<sup>49</sup>. This illustrates the potential of HCI to provide guidance for the implantation of  
422 complementary low throughput assays to assess defects at the functional and molecular level.  
423 At this stage, we cannot generalize the case of the ARPC1B deficiency in establishing a  
424 systematic relationship between IS alteration and functional defect. However, it is interesting  
425 to mention that multiple primary immunodeficiencies have been found by us and others to  
426 associate IS defects and functional impairments<sup>50-53</sup>. Previous reports have also shown that  
427 PIDs where the IS is defective fail to eliminate target cells<sup>51,53,54</sup>. The systematic analysis of  
428 multiple such pathologies and corresponding cellular models would certainly provide a  
429 unique opportunity to establish rules linking morphology to function.

430 Overall, we provide here an innovative HCI approach to unbiasedly interrogate the biology of  
431 lymphocyte populations. It provides a rich way to identify and interpret details of the IS  
432 architecture and surpass current approaches in detecting morphological traits of specific  
433 lymphocyte populations, as illustrated by the distinct morphological profiles identified among  
434 the primary lymphocytes of individual donors. This hold promises to stratify patients based  
435 on specific morphotypes of lymphocytes or other leukocytes. Therefore, we thoroughly report  
436 both the experimental and computational methods employed and provide all scripts used in  
437 the analysis to maximize the reproducibility of the approach developed herein. We hope this  
438 encourages further research leveraging the application of HCI to blood-derived cell subsets,  
439 for potential translation in the field of cancer therapy and personalized medicine.



## 440 **Materials and methods**

### 441 **Cell lines and primary cells**

442 Jurkat cells were cultured in RPMI (Gibco) supplemented with 10% FBS, 1%  
443 penicillin/streptomycin, 1% sodium pyruvate, 1% non-essential amino acids and 1% HEPES  
444 (all from Thermo Fisher Scientific). NK-92 cells were cultured according to the  
445 recommendations from ATCC. Primary NK cells were purified from freshly-isolated PBMCs  
446 using the MagniSort Human NK enrichment kit (Invitrogen) and maintained in RPMI  
447 supplemented with 5% human serum, 1% penicillin/streptomycin, 1% sodium pyruvate, 1%  
448 non-essential amino acids and 1% HEPES. Primary CD8<sup>+</sup> T cells were purified from frozen  
449 PBMCs of 3 healthy donors and 2 ARPC1B deficient patients by negative selection using the  
450 EasySep Human CD8<sup>+</sup> T cell enrichment kit. CD8<sup>+</sup> T cells were stimulated in RPMI  
451 supplemented with 5% human serum, 1% penicillin/streptomycin, 1% sodium pyruvate, 1%  
452 non-essential amino acids, 1% HEPES 1 µg/ml PHA and 100 IU/ml IL-2. CD8<sup>+</sup> T cells were  
453 expanded for further rounds every 2 weeks with a mixture of irradiated PBMCs from 3  
454 normal donors. Peripheral blood from healthy donors and patients was obtained in  
455 accordance with the 1964 Helsinki declaration and its later amendments or ethical standards.  
456 Informed consents were approved by the relevant local Institutional Ethical Committees.

457

### 458 **Culture and staining conditions used for High content imaging**

459 CellCarrier Ultra tissue culture treated plates (Perkin Elmer) were coated with either 0.01%  
460 PLL (Merck) or a combination of 2 µg/ml ICAM-1 (R&D Systems), 1 µg/ml NKp30 (R&D  
461 systems, MAB18491) and 1 µg/ml NKp46 (BD Biosciences, 557487). NK-92 cells were  
462 cultured in IL-2 free medium overnight. 15000 NK-92 and 5000 primary NK cells were  
463 seeded per well and left for 30 min at 37°C to adhere and form the synapse. Cells were fixed  
464 with 3% paraformaldehyde (Merck) and stained with anti-perforin Ab and phalloidin-AF 488.

465 Goat anti-mouse AF 555 was used to reveal perforin staining. Nuclei were stained with  
466 DAPI.

467 NK-92 were treated with 5, 10 and 50  $\mu$ M Blebbistatin, 10, 25 and 50  $\mu$ M CK-869 (Merck),  
468 0.1, 1 and 2.5  $\mu$ M Jasplakinolide (Merck), 0.1, 0.25 and 0.5  $\mu$ M Latrunculin B (Merck), 50,  
469 100 and 250  $\mu$ M SMIFH2 (Merck), 10 50 and 100  $\mu$ M Wiskostatin (Merck) and 5, 10 and 25  
470  $\mu$ M Y-27632 (Merck) for 30 min at 37°C and washed twice in PBS before seeding onto the  
471 plates and letting them adhere for 30 min. The same procedure was applied to primary NK  
472 cells treated with 5, 10, 25 and 50  $\mu$ M CK-869 and 25 50, 100 and 250  $\mu$ M SMIFH2.

473 CellCarrier Ultra multiwell tissue culture treated plates were coated with either 0.01% poly-  
474 L-lysine or a combination of 2  $\mu$ g/ml ICAM-1 and 10  $\mu$ g/ml anti-CD3 (eBioscience). 10000  
475 Jurkat or 5000 CD8<sup>+</sup> T cells were seeded per well and left for 15 min at 37°C to adhere and  
476 form the synapse. Cells were fixed with 3% paraformaldehyde and stained with anti-LFA-1  
477 (BioLegend, 301202) and phalloidin-AF 488 (Thermo Fisher Scientific) in permeabilization  
478 buffer (eBioscience). Goat anti-mouse AF 647 antibody (Thermo Fisher Scientific, A-21240)  
479 was used to reveal LFA-1 staining. CD8<sup>+</sup> T cells were in addition stained with anti-perforin  
480 and goat anti-mouse AF 555 (Life technologies) was used to reveal perforin staining. Nuclei  
481 were stained with DAPI (Thermo Fisher Scientific). Stained cells were kept in PBS at 4°C  
482 until imaging.

483

#### 484 **Image acquisition and processing**

485 Images were acquired on an automated spinning disk confocal HCS device (Opera Phenix,  
486 Perkin Elmer) equipped with a 40x 1.1 NA Plan Apochromat water immersion objective and  
487 a sCMOS camera. For each well, 40 randomly selected fields and 8 stacks per field (0.5  $\mu$ m  
488 step) were acquired. Stacks of images were combined with maximum projection for four  
489 focal slices ( $z$  from 1 to 4 with a 0.5  $\mu$ m step), then assembled in sets of images per field of

490 view corresponding to DAPI, phalloidin and LFA-1 or perforin depending on the cell type  
491 imaged. These datasets were processed, and measurements were made using CellProfiler  
492 3.0<sup>18</sup> (see Supplementary Files [CellProfiler pipeline]). In brief, we assess the image quality,  
493 log-transform the intensities for experiments with high background noise, correct the  
494 illumination on each image based on background intensities, avoid DNA precipitations by  
495 multiplying intensities on DAPI channel by phalloidin intensities before segmenting cell  
496 nuclei using global minimum cross entropy thresholding. We perform a secondary  
497 segmentation of the cytoplasms using the watershed method<sup>55</sup> and global minimum cross  
498 entropy thresholding on the phalloidin channel. Image sets with low maximal DNA intensity  
499 or showing no nucleus were discarded. Cells having more than 30% of their cytoplasm  
500 surface at less than 5 pixels of another cell were removed, in order to ignore clusters of cells  
501 and to focus on single cells displaying an IS. We segmented small actin speckles in the  
502 cytoplasm at more than 3 pixels from the membrane as well as speckles of perforin and  
503 secondary objects spanned around the nuclei by LFA-1 staining. Additionally, primary NK  
504 and expanded CD8<sup>+</sup> T cells associated with less than 2 perforin granules were excluded from  
505 the analysis. Finally, we measured colocalization of these objects, intensities in the nuclei and  
506 cytoplasms, granularity on all channels, textural and shape features, intensity distributions,  
507 distance and overlap between objects and counted speckles neighbors less than 10 pixels  
508 away. We then kept the average and the standard deviation of these features per field of view.  
509 This led to 1898 and 2076 morphological features in NK92 and Jurkat cells respectively. For  
510 primary NK cells and expanded CD8<sup>+</sup> T cells, features related to actin speckles were  
511 excluded, as they were not found to be informative, resulting in 2386 and 1517 features,  
512 respectively.

513 Stacks of images were combined with maximum projection for four focal slices ( $z$  from 1 to 4  
514 with a 0.5  $\mu\text{m}$  step), then assembled in sets of images per field of view corresponding to

515 DAPI, phalloidin and LFA-1 or perforin depending on the cell type imaged. These datasets  
516 were processed, and measurements were made using CellProfiler 3.0<sup>18</sup> (see the pipelines  
517 provided).

518 In brief, we assess the image quality, log-transform the intensities for experiments with high  
519 background noise, correct the illumination on each image based on background intensities,  
520 avoid DNA precipitations by multiplying intensities on DAPI channel by phalloidin  
521 intensities before segmenting cell nuclei using global minimum cross entropy thresholding.  
522 We perform a secondary segmentation of the cytoplasms using the watershed method<sup>55</sup> and  
523 global minimum cross entropy thresholding on the phalloidin channel. Image sets with low  
524 maximal DNA intensity or showing no nucleus were discarded. Cells having more than 30%  
525 of their cytoplasm surface at less than 5 pixels of another cell were removed, in order to  
526 ignore clusters of cells and to focus on single cells displaying an IS. We segmented small  
527 actin speckles in the cytoplasm at more than 3 pixels from the membrane as well as speckles  
528 of perforin and secondary objects spanned around the nuclei by LFA-1 staining. Additionally,  
529 primary NK and expanded CD8<sup>+</sup> T cells associated with less than 2 perforin granules were  
530 excluded from the analysis. Finally, we measured colocalization of these objects, intensities  
531 in the nuclei and cytoplasms, granularity on all channels, textural and shape features,  
532 intensity distributions, distance and overlap between objects and counted speckles neighbors  
533 less than 10 pixels away. We then kept the average and the standard deviation of these  
534 features per field of view. This led to 1898 and 2076 morphological features in NK92 and  
535 Jurkat cells respectively. For primary NK cells and expanded CD8<sup>+</sup> T cells, features related to  
536 actin speckles were excluded, as they were not found to be informative, resulting in 2386 and  
537 1517 features, respectively.

538

539

540 **Data processing and visualization**

541 We subsequently conducted analyses in R 3.5.1 with the data visualization package ggplot2  
542 3.1.1 and Microsoft Excel (Version 1902). We further selected a smaller set of informative  
543 morphological features and checked the quality of processed images by (i) removing wells  
544 with low maximal DNA intensity and cell count, (ii) removing features and images  
545 generating missing values and (iii) removing constant features in the study dataset or the  
546 subset of negative controls used as reference.

547 From these images passing our quality checks, up to 16 raw summary variables were  
548 extracted based on their interpretability and on their known relevance to describe ISs. The  
549 fold changes compared to unstimulated or untreated controls were further reported and  
550 displayed in the form of radar charts.

551 On the other hand, for all features, per-image values  $X$  were transformed successively with  
552 the following functions  $f_1$  and  $f_2$ , with  $X_{Control}$  the negative controls in  $X$  on which the data  
553 is normalized:

$$f_1(X) = \log(X + 1 - \min(X))$$

$$f_2(X) = X - \frac{\text{median}(X_{Control})}{\text{mad}(X_{Control})}$$

554

555 To remove redundancy in the set of features used for downstream analyses, we ensured that  
556 the selected variables were not excessively linearly correlated. To do so, all features were  
557 ordered from highest to lowest median absolute deviation (hence by variation in the  
558 experiment compared to negative controls). Starting from the top of this list, all other features  
559 linearly correlated to the first feature with a Pearson's coefficient higher than 0.6 were  
560 excluded. We sequentially went on with the next remaining feature in the list and iterated  
561 until the acquisition of a small and informative set of uncorrelated features.

562 This set of features was used for visualization and quantification of the overall morphological  
563 changes induced by perturbations. We then reduced the dimensionality of the data using the  
564 UMAP algorithm<sup>56</sup> to 2 dimensions for visualizations and 3 dimensions for computation of  
565 the statistical significance of morphological effects in the drug screen on NK92. This pipeline  
566 succeeded in selecting a wide range of features that were not excessively biased by  
567 confounders (**Fig. S2d**).

568

### 569 **Robust Morphological Perturbation Value**

570 To quantify the significance of overall changes in morphology between a perturbed state and  
571 a reference state (healthy or untreated cells), we define the Robust Morphological  
572 Perturbation Value. This extends the concept of Multidimensional Perturbation Value<sup>33</sup>,  
573 which defines a single value summarizing the statistical significance of morphological  
574 changes in multidimensional spaces, by using robust statistics and the minimum covariance  
575 determinant<sup>34</sup> decreasing the sensitivity to technical (unfiltered artifacts) and biological  
576 outliers (images displaying extreme morphologies or uncommon cell states). In brief, the  
577 RMPV is obtained for  $X$  the set of all filtered and uncorrelated features and  $X_{WT}$  the subset of  
578 the data corresponding to images of the reference population in five steps. First, the minimum  
579 covariance determinant estimator  $M(X_{WT})$  is calculated to describe the variation of  
580 morphologies observed in the reference set, using its implementation in the R package  
581 *robustBase* version 0.93. Second, this value is used to determine  $R$ , the robust Mahalanobis  
582 distance of each images of  $X$  to  $X_{WT}$  [arXiv:1904.02596 [stat.ME]]. Third, the median value  
583  $\tilde{R} = \text{median}(R)$  was obtained for each drug tested. Fourth, for 2000 iterations the labels of  
584 the condition and the reference were randomly permuted to obtain an empirical distribution  
585 of  $\tilde{R}$  under the assumption that there was no difference between the multivariate location and  
586 scatter of the morphological parameters of the perturbation and the reference. Finally, the

587 RMPV is defined as the empirical p-value obtained from these distributions after FDR  
588 adjustment for testing changes in multiple conditions and indicates the probability of  
589 observing at least half of the images displaying morphological changes of a similar intensity  
590 if the perturbation was similar to the reference.

591

## 592 **Random forest classification and interpretation**

593 Using the set of informative and uncorrelated morphological features – previously used for  
594 dimensionality reduction, we trained a random forest classifier<sup>57</sup> using the R package  
595 *randomForest* version 4.6.

596 Using the set of informative and uncorrelated morphological features – previously used for  
597 dimensionality reduction, we trained a random forest classifier<sup>57</sup> using the R package  
598 *randomForest* version 4.6. Each forest included 1000 decision trees. The data was split in 6  
599 folds of equal size, each containing all possible classification label. To select the optimal  
600 number *mtry* of variables selected at each split, we incremented the parameter value from 20  
601 to 90 by steps of 10 and assessed the performance using the macro  $F_1$  score as defined below  
602 in a 5-fold cross-validation scheme. One extra fold was used as validation set to estimate the  
603 performance of the model after selection of the optimal parameters and retraining on all of  
604 the 5 folds used for cross-validation. In the case of the drug screen on the NK-92 cell line, we  
605 used a similar approach using the 13 features of known relevance in describing the IS as  
606 input, and testing *mtry* values from 1 to 13 with steps of 3. Overall the performance was  
607 evaluated using the macro  $F_1$  score:

$$F_1 = \frac{1}{n} \sum_{i=1}^n \frac{2 \times TP_i}{2 \times TP_i + FP_i + FN_i}$$

608 where  $n$  is the number of categories in the classification, and  $TP_i$ ,  $FP_i$  and  $FN_i$  are  
609 respectively the number of true positives, false positives and false negatives for category  $i$  in

610 the validation set. To interpret the feature importance in the prediction, we extracted the mean  
611 decrease in accuracy obtained when including each feature, either for the prediction of a  
612 given class or overall using micro averaging. The total and average importance of features  
613 split in distinct groups based on the type of measurements and biological object described  
614 were calculated as well. These feature groups were defined based on the corresponding  
615 CellProfiler measurement types and biological objects. Features that did not describe the  
616 cytoplasm, nucleus, perforin granules or actin granules were counted in the “Other”  
617 biological object category. Similarly, features that did not correspond to the “Texture”,  
618 “AreaShape”, “RadialDistribution”, “Granularity” or “Intensity” measurements were grouped  
619 under the term “Other”.

620

### 621 **Cytotoxicity assay**

622 Target P815 cells were stained for 30 min with Cell Tracker green CMFDA (Thermo Fisher  
623 Scientific) and coated with 10 µg/ml anti-CD3 (eBiosciences, 16-0037-81) for one hour at  
624 37°C. They were also treated with 0.2 µg/ml of aphidicolin to prevent their proliferation.  
625 P815 were incubated with effector CD8<sup>+</sup> T cells in U-bottom 96 well plates at an effector:  
626 target ratio of 1:1 for 4 and 24 hours<sup>58</sup>. Cells were then stained with Amino-Actinomycin D  
627 (7-AAD) (BD Biosciences) to discriminate dead and alive cells using the MacsQuant VYB  
628 (Miltenyi) and analyzed with FlowJo. The number of residual alive CMFDA<sup>+</sup> / 7-AAD<sup>-</sup> cells  
629 was assessed to calculate cytotoxicity. Student’s *t*-test was used to calculate significance.

630

### 631 **Phenotypic analysis**

632 Expanded CD8<sup>+</sup> T cells from normal donors and ARPC1B-deficient patients were stained  
633 with fluorochrome-coupled antibodies recognizing the extracellular markers CD8  
634 (BioLegend, 344718) and LFA-1 (BioLegend, 363404) for 30 min at 4°C. Intracellular



635 staining was performed following fixation and permeabilization, with the following  
636 antibodies perforin (BioLegend, 308110) and granzyme B (BDPharmigen, 561142) for 45  
637 min at 4°C. The data were acquired on MacsQuant Q10 (Miltenyi) and analyzed with  
638 FlowJo. Student's *t*-test was used to calculate significance.

639

#### 640 **Data availability**

641 All the CellProfiler pipelines and morphological measurements used in this analysis are made  
642 available on FigShare with the DOI 10.6084/m9.figshare.11619960 [already available for  
643 reviewers with the following private link: <https://figshare.com/s/3c06753839d77783a899>].

644

#### 645 **Code availability**

646 The analyses can be found and reproduced using the Docker image and scripts provided on  
647 Github and identified with the DOI 10.5281/zenodo.3518233.

## 648 **Acknowledgements**

649 The authors thank Fatima-Ezzahra L'Faqihi-Olive, Valérie Duplan-Eche, Anne-Laure  
650 Iscache and Lydia De La Fuente-Vizueté from the cytometry platform of the CPTP and  
651 Isabelle Fernandes from the Organoid platform of the IRSD, Muriel Quaranta-Nicaise,  
652 Laurène Pfajfer, Michael Caldera, Marianne Guisset and Anton Kamnev for discussion and  
653 technical advice, Alessandro Aiuti, Marco Gattorno and Stefano Volpi for patient-derived  
654 cell lines. Y.G. performed the experiments, analyzed the results and wrote the paper, L.V.  
655 designed and performed data analysis and wrote the paper. A.R. contributed in image  
656 acquisition. A.F., J.M. and K.B. participated in research design and scientific discussions.  
657 L.D. designed the research, supervised the experiment analysis and wrote the paper.  
658 The authors declare no competing interests.

## 659 **Funding**

660 This work was supported by the Vienna Science and Technology Fund (WWTF-LS16-060 to  
661 K.B. J.M. and L.D.), the INSERM Plan Cancer program (C15092BS to L.D.) and the  
662 Association Laurette Fugain (to L.D.).  
663

## 664 **References**

- 665 1. Grakoui, A. *et al.* The immunological synapse: A molecular machine controlling T cell  
666 activation. *Science*. **285**, 221–227 (1999).
- 667 2. Monks, C. R. F., Freiberg, B. A., Kupfer, H., Sciaky, N. & Kupfer, A. Three-  
668 dimensional segregation of supramolecular activation clusters in T cells. *Nature* **395**,  
669 82–86 (1998).
- 670 3. Somersalo, K. *et al.* Cytotoxic T lymphocytes form an antigen-independent ring  
671 junction. *J. Clin. Invest.* **113**, 49–57 (2004).
- 672 4. Anikeeva, N. *et al.* Distinct role of lymphocyte function-associated antigen-1 in  
673 mediating effective cytolytic activity by cytotoxic T lymphocytes. *Proc. Natl. Acad.*  
674 *Sci. U. S. A.* **102**, 6437–6442 (2005).
- 675 5. Bryceson, Y. T., March, M. E., Ljunggren, H.-G. & Long, E. O. Synergy among  
676 receptors on resting NK cells for the activation of natural cytotoxicity and cytokine  
677 secretion. *Blood* **107**, 159–166 (2006).
- 678 6. Zhang, M., March, M. E., Lane, W. S. & Long, E. O. A signaling network stimulated  
679 by 2 integrin promotes the polarization of lytic granules in cytotoxic cells. *Sci. Signal.*  
680 **7**, ra96–ra96 (2014).
- 681 7. Urlaub, D., Höfer, K., Müller, M.-L. & Watzl, C. LFA-1 Activation in NK Cells and  
682 Their Subsets: Influence of Receptors, Maturation, and Cytokine Stimulation. *J.*  
683 *Immunol.* **198**, 1944–1951 (2017).
- 684 8. Geiger, B., Rosen, D. & Berke, G. Spatial relationships of microtubule-organizing  
685 centers and the contact area of cytotoxic t lymphocytes and target cells. *J. Cell Biol.*  
686 **95**, 137–143 (1982).
- 687 9. Ilani, T., Vasiliver-Shamis, G., Vardhana, S., Bretscher, A. & Dustin, M. L. T cell  
688 antigen receptor signaling and immunological synapse stability require myosin IIA.

- 689 *Nat. Immunol.* **10**, 531–539 (2009).
- 690 10. Rak, G. D., Mace, E. M., Banerjee, P. P., Svitkina, T. & Orange, J. S. Natural Killer  
691 Cell Lytic Granule Secretion Occurs through a Pervasive Actin Network at the  
692 Immune Synapse. *PLoS Biol.* **9**, e1001151 (2011).
- 693 11. Dustin, M. L. & Long, E. O. Cytotoxic immunological synapses: NK and CTL  
694 synapses. *Immunol. Rev.* **235**, 24–34 (2010).
- 695 12. Burns, S. O., Zараfov, A. & Thrasher, A. J. Primary immunodeficiencies due to  
696 abnormalities of the actin cytoskeleton. *Curr. Opin. Hematol.* **24**, 16–22 (2017).
- 697 13. Mace, E. M. & Orange, J. S. Insights into primary immune deficiency from  
698 quantitative microscopy. *J. Allergy Clin. Immunol.* **136**, 1150–1162 (2015).
- 699 14. Joshi, P. & Lee, M. Y. High content imaging (HCI) on miniaturized three-dimensional  
700 (3D) cell cultures. *Biosensors* **5**, 768–790 (2015).
- 701 15. Priestley, R. S. *et al.* A novel high-content imaging-based technique for measuring  
702 binding of Dickkopf-1 to low-density lipoprotein receptor-related protein 6. *J.*  
703 *Pharmacol. Toxicol. Methods* **95**, 47–55 (2019).
- 704 16. Wu, L. S. & Li, J. High-Content Imaging Phenotypic Screen for Neurogenesis Using  
705 Primary Neural Progenitor Cells. in 101–113 (2018). doi:10.1007/978-1-4939-7847-  
706 2\_8.
- 707 17. Papakonstantinou, S. & James O’Brien, P. High content imaging for the morphometric  
708 diagnosis and immunophenotypic prognosis of canine lymphomas. *Cytom. Part B -*  
709 *Clin. Cytom.* **86**, 373–382 (2014).
- 710 18. Adelman, C. H., Wang, T., Sabatini, D. M. & Lander, E. S. Genome-Wide  
711 CRISPR/Cas9 Screening for Identification of Cancer Genes in Cell Lines. in 125–136  
712 (2019). doi:10.1007/978-1-4939-8967-6\_10.
- 713 19. Caldera, M. *et al.* Mapping the perturbome network of cellular perturbations. *Nat.*

- 714 *Commun.* **10**, 5140 (2019).
- 715 20. Sieprath, T., Corne, T., Robijns, J., Koopman, W. J. H. & de Vos, W. H. Cellular  
716 redox profiling using high-content microscopy. *J. Vis. Exp.* **2017**, (2017).
- 717 21. Yin, Z. *et al.* How cells explore shape space: A quantitative statistical perspective of  
718 cellular morphogenesis. *BioEssays* **36**, 1195–1203 (2014).
- 719 22. Yu, K. K. H. *et al.* High content screening of patient-derived cell lines highlights the  
720 potential of non-standard chemotherapeutic agents for the treatment of glioblastoma.  
721 *PLoS One* **13**, 1–17 (2018).
- 722 23. Massey, A. J. A high content, high throughput cellular thermal stability assay for  
723 measuring drugtarget engagement in living cells. *PLoS One* **13**, 1–17 (2018).
- 724 24. Rohban, M. H. *et al.* Systematic morphological profiling of human gene and allele  
725 function via Cell Painting. *Elife* **6**, (2017).
- 726 25. McQuin, C. *et al.* CellProfiler 3.0: Next-generation image processing for biology.  
727 *PLOS Biol.* **16**, e2005970 (2018).
- 728 26. Dieckmann, N. M. G., Frazer, G. L., Asano, Y., Stinchcombe, J. C. & Griffiths, G. M.  
729 The cytotoxic T lymphocyte immune synapse at a glance. *J. Cell Sci.* **129**, 2881–2886  
730 (2016).
- 731 27. Krzewski, K. & Coligan, J. E. Human NK cell lytic granules and regulation of their  
732 exocytosis. *Front. Immunol.* **3**, 1–16 (2012).
- 733 28. Mace, E. M. *et al.* NK cell lytic granules are highly motile at the immunological  
734 synapse and require F-actin for post-degranulation persistence. *J. Immunol.*  
735 (*Baltimore, Md. 1950*) **189**, 4870–4880 (2012).
- 736 29. Mace, E. M. *et al.* Cell biological steps and checkpoints in accessing NK cell  
737 cytotoxicity. *Immunol. Cell Biol.* **92**, 245–55 (2014).
- 738 30. Brown, A. C. N. *et al.* Remodelling of Cortical Actin Where Lytic Granules Dock at

- 739 Natural Killer Cell Immune Synapses Revealed by Super-Resolution Microscopy.  
740 *PLoS Biol.* **9**, e1001152 (2011).
- 741 31. Lin, W. *et al.* Morphological change of CD4+ T cell during contact with DC  
742 modulates T-cell activation by accumulation of F-actin in the immunology synapse.  
743 *BMC Immunol.* **16**, 49 (2015).
- 744 32. Piragyte, I. & Jun, C.-D. Actin Engine in Immunological Synapse. *Immune Netw.* **12**,  
745 71 (2012).
- 746 33. Houmadi, R. *et al.* The Wiskott-Aldrich Syndrome Protein Contributes to the  
747 Assembly of the LFA-1 Nanocluster Belt at the Lytic Synapse. *Cell Rep.* **22**, 979–991  
748 (2018).
- 749 34. Carisey, A. F., Mace, E. M., Saeed, M. B., Davis, D. M. & Orange, J. S. Nanoscale  
750 Dynamism of Actin Enables Secretory Function in Cytolytic Cells. *Curr. Biol.* **28**,  
751 489-502.e9 (2018).
- 752 35. Bubb, M. R., Spector, I., Beyer, B. B. & Fosen, K. M. Effects of Jasplakinolide on the  
753 Kinetics of Actin Polymerization. *J. Biol. Chem.* **275**, 5163–5170 (2000).
- 754 36. Lyubchenko, T. A., Wurth, G. A. & Zweifach, A. The actin cytoskeleton and cytotoxic  
755 T lymphocytes: evidence for multiple roles that could affect granule exocytosis-  
756 dependent target cell killing. *J. Physiol.* **547**, 835–847 (2003).
- 757 37. Andzelm, M. M., Chen, X., Krzewski, K., Orange, J. S. & Strominger, J. L. Myosin  
758 IIA is required for cytolytic granule exocytosis in human NK cells. *J. Exp. Med.* **204**,  
759 2285–2291 (2007).
- 760 38. Sanborn, K. B. *et al.* Myosin IIA Associates with NK Cell Lytic Granules to Enable  
761 Their Interaction with F-Actin and Function at the Immunological Synapse. *J.*  
762 *Immunol.* **182**, 6969–6984 (2009).
- 763 39. Tabdanov, E. *et al.* Micropatterning of TCR and LFA-1 ligands reveals

- 764 complementary effects on cytoskeleton mechanics in T cells. *Integr. Biol.* **7**, 1272–  
765 1284 (2015).
- 766 40. De Meester, J., Calvez, R., Valitutti, S. & Dupré, L. The Wiskott-Aldrich syndrome  
767 protein regulates CTL cytotoxicity and is required for efficient killing of B cell  
768 lymphoma targets. *J. Leukoc. Biol.* **88**, 1031–1040 (2010).
- 769 41. Hutz, J. E. *et al.* The Multidimensional Perturbation Value. *J. Biomol. Screen.* **18**,  
770 367–377 (2013).
- 771 42. Rousseeuw, P. J. & Leroy, A. M. *Robust Regression and Outlier Detection*. (John  
772 Wiley & Sons, Inc., 1987). doi:10.1002/0471725382.
- 773 43. Angelo, L. S. *et al.* Practical NK cell phenotyping and variability in healthy adults.  
774 *Immunol. Res.* **62**, 341–356 (2015).
- 775 44. Bryce, N. S. *et al.* High-Content Imaging of Unbiased Chemical Perturbations Reveals  
776 that the Phenotypic Plasticity of the Actin Cytoskeleton Is Constrained. *Cell Syst.* **9**,  
777 496-507.e5 (2019).
- 778 45. Breinig, M., Klein, F. A., Huber, W. & Boutros, M. A chemical–genetic interaction  
779 map of small molecules using high-throughput imaging in cancer cells. *Mol. Syst.*  
780 *Biol.* **11**, 846 (2015).
- 781 46. Caie, P. D. *et al.* High-Content Phenotypic Profiling of Drug Response Signatures  
782 across Distinct Cancer Cells. *Mol. Cancer Ther.* **9**, 1913–1926 (2010).
- 783 47. Caicedo, J. C., McQuin, C., Goodman, A., Singh, S. & Carpenter, A. E. Weakly  
784 Supervised Learning of Single-Cell Feature Embeddings. in *2018 IEEE/CVF*  
785 *Conference on Computer Vision and Pattern Recognition* 9309–9318 (IEEE, 2018).  
786 doi:10.1109/CVPR.2018.00970.
- 787 48. Lu, A. X., Kraus, O. Z., Cooper, S. & Moses, A. M. Learning unsupervised feature  
788 representations for single cell microscopy images with paired cell inpainting. *PLOS*

- 789            *Comput. Biol.* **15**, e1007348 (2019).
- 790    49.    Rohban, M. H., Abbasi, H. S., Singh, S. & Carpenter, A. E. Capturing single-cell  
791            heterogeneity via data fusion improves image-based profiling. *Nat. Commun.* **10**, 2082  
792            (2019).
- 793    50.    Fritzsche, M. *et al.* Cytoskeletal actin dynamics shape a ramifying actin network  
794            underpinning immunological synapse formation. *Sci. Adv.* **3**, (2017).
- 795    51.    Roy, N. H. & Burkhardt, J. K. The actin cytoskeleton: A mechanical intermediate for  
796            signal integration at the immunological synapse. *Front. Cell Dev. Biol.* **6**, 1–7 (2018).
- 797    52.    Hetrick, B., Han, M. S., Helgeson, L. A. & Nolen, B. J. Small Molecules CK-666 and  
798            CK-869 Inhibit Actin-Related Protein 2/3 Complex by Blocking an Activating  
799            Conformational Change. *Chem. Biol.* **20**, 701–712 (2013).
- 800    53.    Litterman, A. J., Zellmer, D. M., LaRue, R. S., Jameson, S. C. & Largaespada, D. A.  
801            Antigen-Specific Culture of Memory-like CD8 T Cells for Adoptive Immunotherapy.  
802            *Cancer Immunol. Res.* **2**, 839–845 (2014).
- 803    54.    Brigida, I. *et al.* T-cell defects in patients with ARPC1B germline mutations account  
804            for combined immunodeficiency. **132**, 2362–2374 (2019).
- 805    55.    Somech, R. *et al.* Disruption of Thrombocyte and T Lymphocyte Development by a  
806            Mutation in ARPC1B. *J. Immunol.* **199**, 4036–4045 (2017).
- 807    56.    Randzavola, L. O. *et al.* Loss of ARPC1B impairs cytotoxic T lymphocyte  
808            maintenance and cytolytic activity. *J. Clin. Invest.* (2019) doi:10.1172/JCI129388.
- 809    57.    Salzer, E. *et al.* RASGRP1 deficiency causes immunodeficiency with impaired  
810            cytoskeletal dynamics. *Nat. Immunol.* **17**, 1352–1360 (2016).
- 811    58.    Mace, E. M. & Orange, J. S. Lytic immune synapse function requires filamentous actin  
812            deconstruction by Coronin 1A. *Proc. Natl. Acad. Sci. U. S. A.* **111**, 6708–6713 (2014).
- 813    59.    Gil-Krzewska, A. *et al.* An actin cytoskeletal barrier inhibits lytic granule release from



- 814 natural killer cells in patients with Chediak-Higashi syndrome. *J. Allergy Clin.*  
815 *Immunol.* **142**, 914-927.e6 (2018).
- 816 60. Pfajfer, L. *et al.* WIP deficiency severely affects human lymphocyte architecture  
817 during migration and synapse assembly. *Blood* **130**, 1949–1953 (2017).
- 818 61. Mizesko, M. C. *et al.* Defective actin accumulation impairs human natural killer cell  
819 function in patients with dedicator of cytokinesis 8 deficiency. *J. Allergy Clin.*  
820 *Immunol.* **131**, 840–848 (2013).
- 821 62. Vincent, L. & Soille, P. Watersheds in digital spaces: an efficient algorithm based on  
822 immersion simulations. *IEEE Trans. Pattern Anal. Mach. Intell.* **13**, 583–598 (1991).
- 823 63. McInnes, L., Healy, J., Saul, N. & Großberger, L. UMAP: Uniform Manifold  
824 Approximation and Projection. *J. Open Source Softw.* **3**, 861 (2018).
- 825 64. Breiman, L. Random Forests. *Mach. Learn.* **45**, 5–32 (2001).

826

827

828 **Figure legends**

829 **Fig. 1 | High content imaging of the immunological synapse in lymphocytic cell lines. a.**

830 Schematic representation of the High content imaging pipeline. **b.** Representative images of  
831 NK-92 cells seeded on Poly-L-Lysine (PLL) or ICAM-1 plus anti-NKp30 / NKp46 Ab,  
832 stained for F-actin (green), perforin (yellow) and the nucleus (DAPI). Scale bars: 10  $\mu$ m. **c.**  
833 Selected IS features analysed as fold change of ICAM-1 plus anti-NKp30 / NKp46 Ab over  
834 PLL. The data represent the mean of three separate experiments (n= 933-5860 cells). **d.** Mean  
835 nucleus area in pixels and median F-actin intensity per image across PLL and ICAM-1 plus  
836 anti-NKp30 / NKp46 Ab conditions. **e.** F-actin intensity distribution per cell across PLL and  
837 ICAM-1 plus anti-NKp30 / NKp46 Ab conditions. **f.** Representative images of Jurkat cells on  
838 PLL or ICAM-1 plus anti-CD3 Ab, stained for F-actin (green), LFA-1 (red) and the nucleus  
839 (DAPI). Scale bars: 10  $\mu$ m. **g.** Selected IS features analysed as fold change of ICAM-1 plus  
840 anti-CD3 Ab over PLL. The data represent the mean of triplicates (n= 125-940 cells). **h.**  
841 Median F-actin and LFA-1 intensity per image across PLL and ICAM-1 plus anti-CD3 Ab  
842 conditions. **i.** F-actin intensity distribution per cell across PLL and ICAM-1 plus anti-CD3 Ab  
843 conditions.

844

845 **Fig. 2 | Drug treatments yield changes to immunological synapse morphology.** Graphs

846 representing the fold change of IS parameters and representative images of NK-92 cells  
847 seeded on ICAM-1, anti-NKp30 and anti-NKp46, stained for F-actin (green), perforin  
848 granules (yellow) and nuclei (DAPI) and treated with three concentrations of **a.** Latrunculin  
849 **b.** Jasplakinolide, **c.** Blebbistatin, **d.** Y-27632, **e.** CK-968, **f.** Wiskostatin, and **g.** SMIFH2  
850 with respect to the untreated control. **h.** Untreated control. The data represent the mean of  
851 triplicates for each concentration (1425-5541 cells). Scale bars: 10  $\mu$ m.

852

853 **Fig. 3 | Morphological profiling of the NK cell immunological synapse upon drug**  
854 **treatment.** Drug-treated NK-92 cell images were analysed with CellProfiler for an array of  
855 measurements and visualized using UMAP to position drug treated cells with respect to  
856 untreated cells from the same row. **a.** Latrunculin **b.** Jasplakinolide, **c.** Blebbistatin, **d.** Y-  
857 27632, **e.** CK-968, **f.** Wiskostatin, and **g.** SMIFH2. **h.** Confusion matrix and class-wise  
858 performance on held-out data of a random forest model trained to predict drug treatment  
859 based on the morphology of NK-92 cells seeded on ICAM-1, anti-NKp30 and anti-NKp46. **i-**  
860 **j** Total and average importance for the prediction of morphological features per measurement  
861 type and biological object described of NK-92 cells seeded on ICAM-1, anti-NKp30 and anti-  
862 NKp46 and treated with **i.** CK-869 or **j.** SMIFH2.

863

864 **Fig. 4 | CK-869 and SMIFH2 treatments alter immunological synapse architecture and**  
865 **lytic granule polarization in primary NK cells.** **a.** Representative images of primary NK  
866 cells isolated from PBMCs of three normal donors seeded on ICAM-1, anti-NKp30 and anti-  
867 NKp46, stained for F-actin (green), perforin granules (yellow) and nuclei (DAPI) and either  
868 untreated or treated with four concentrations of CK-869 or SMIFH2. Scale bars: 10  $\mu$ m. **b-c**  
869 Graphs representing the fold changes of immunological synapse parameters of primary NK  
870 cells treated with **(b)** CK-869 and **(c)** SMIFH2 with respect to untreated controls. The data  
871 represent the mean of 4 replicates for each drug concentration (60-409 cells).

872

873 **Fig. 5 | High content imaging of the immunological synapse in ARPC1B deficient CD8+**  
874 **T cells.** **a.** Representative images of CD8+ T cells from normal donors and ARPC1B  
875 deficient patients seeded on ICAM-1 and either 1 or 10  $\mu$ g/ml anti-CD3 and stained for F-  
876 actin (green), perforin granules (yellow), LFA-1 (red) and nuclei (DAPI). Scale bars: 10  $\mu$ m.  
877 **b.** Characteristics of the immunological synapse of CD8+ T cells of the two ARPC1B

878 deficient patients represented as fold change with respect to the average of the three normal  
879 donors seeded on ICAM-1 and 1  $\mu\text{g/ml}$  anti-CD3. The data represents the mean of 6  
880 replicates for each donor (10687-19353 cells) **c.** UMAP projection of CD8<sup>+</sup> T cells  
881 morphological profiles from the two patients and the three normal donors seeded on ICAM-1  
882 and 10  $\mu\text{g/ml}$  anti-CD3. **d.** Confusion matrix and class-wise performance on held-out data of a  
883 random forest model trained to discriminate between patient and normal donors based on the  
884 morphology of CD8<sup>+</sup> T cells seeded on ICAM-1 and 10  $\mu\text{g/ml}$  anti-CD3. **e.** Total and  
885 average importance of morphological features per measurement type and biological object  
886 described for the prediction of patient and normal donor CD8<sup>+</sup> T cells seeded on ICAM-1  
887 and 10  $\mu\text{g/ml}$  anti-CD3. **f.** Specific lytic activity of patient and normal donor CD8<sup>+</sup> T cells  
888 incubated with P815 cells coated with 10  $\mu\text{g/ml}$  anti-CD3 after 4 h and 24 h. Values represent  
889 the mean of triplicates and error bars show SD. Significance is noted as \*(P < 0.05).

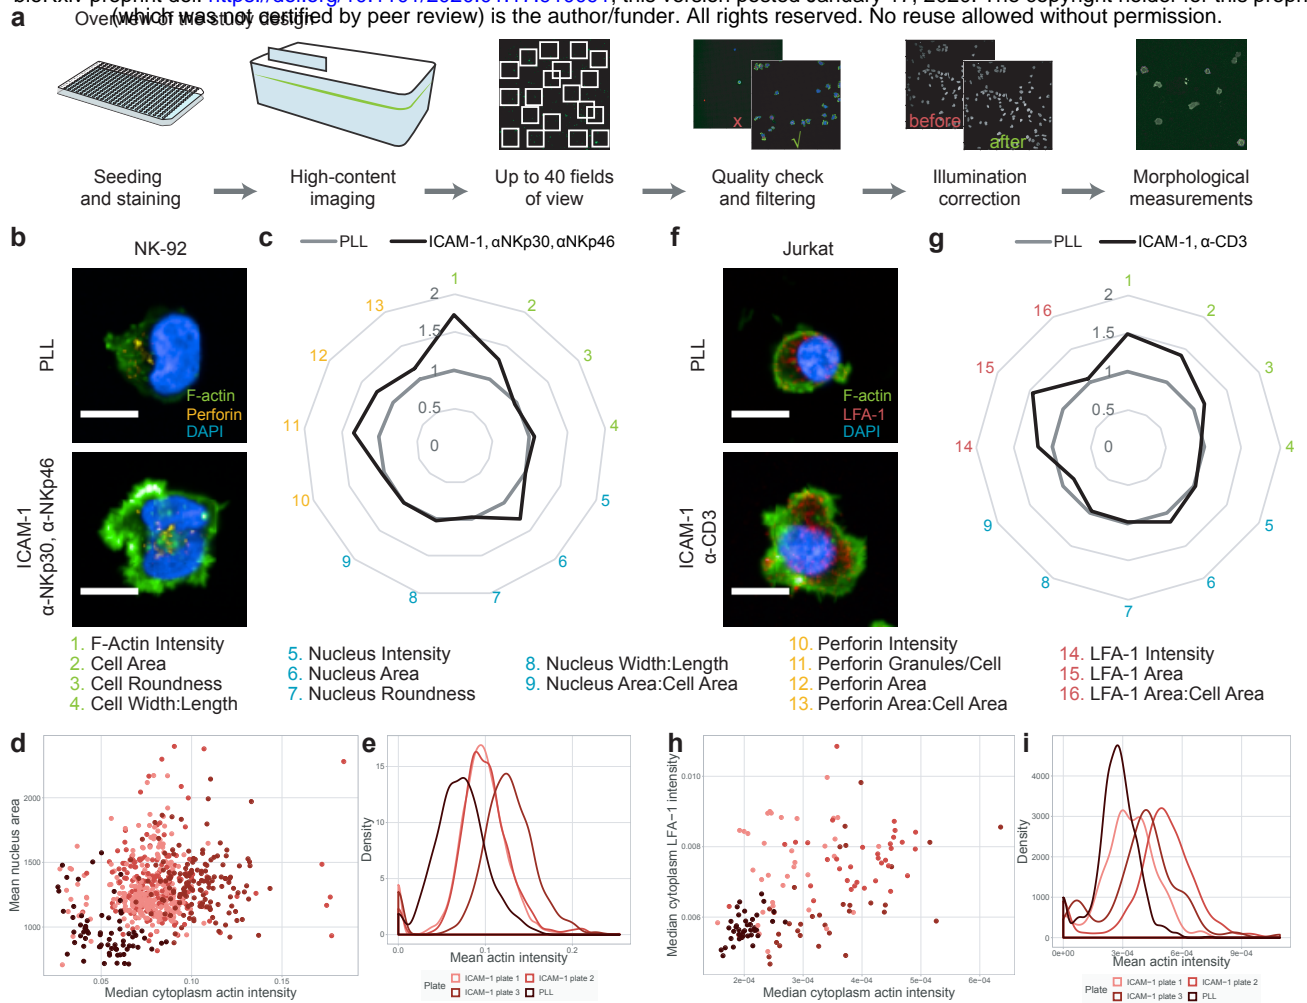

Fig. 1 | High content imaging of the immunological synapse in lymphocytic cell lines.

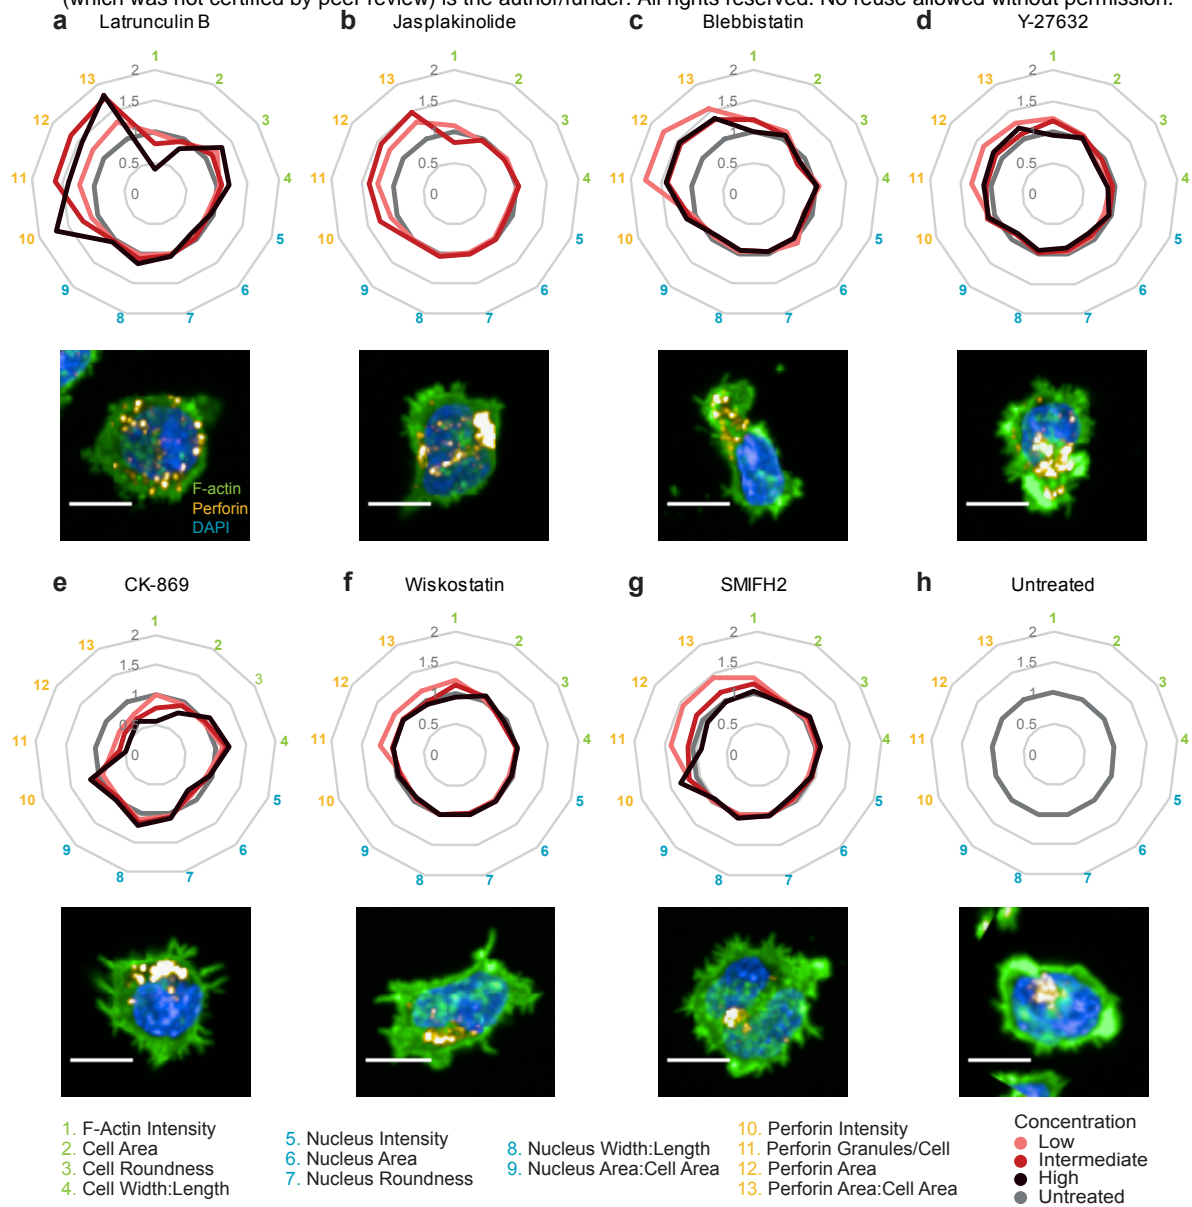

Fig. 2 | Drug treatments yield changes to immunological synapse morphology.

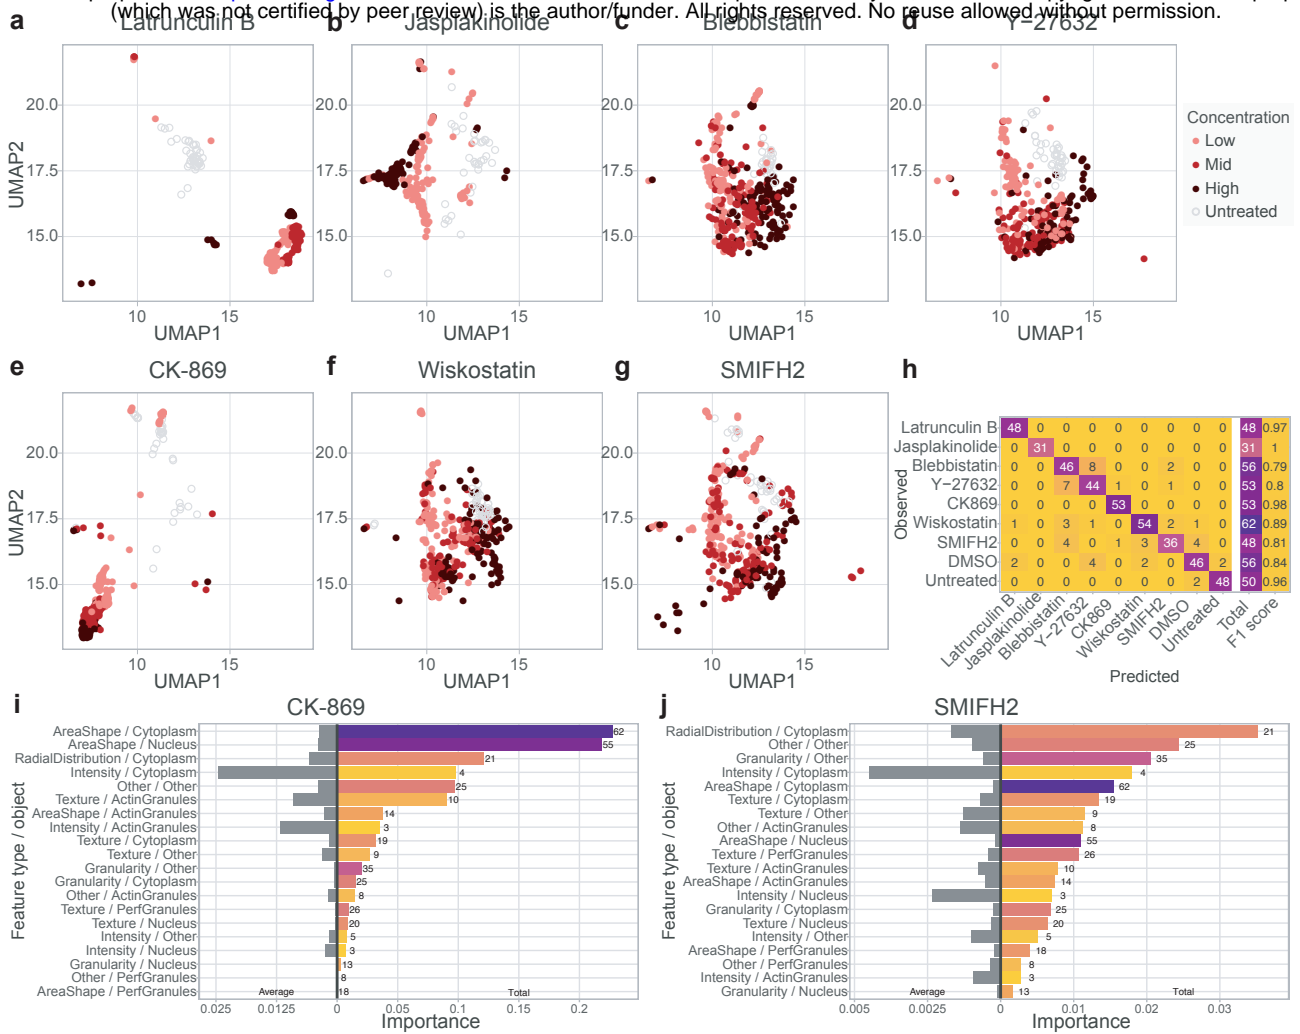

Fig. 3 | Morphological profiling of the NK cell immunological synapse upon drug treatment.

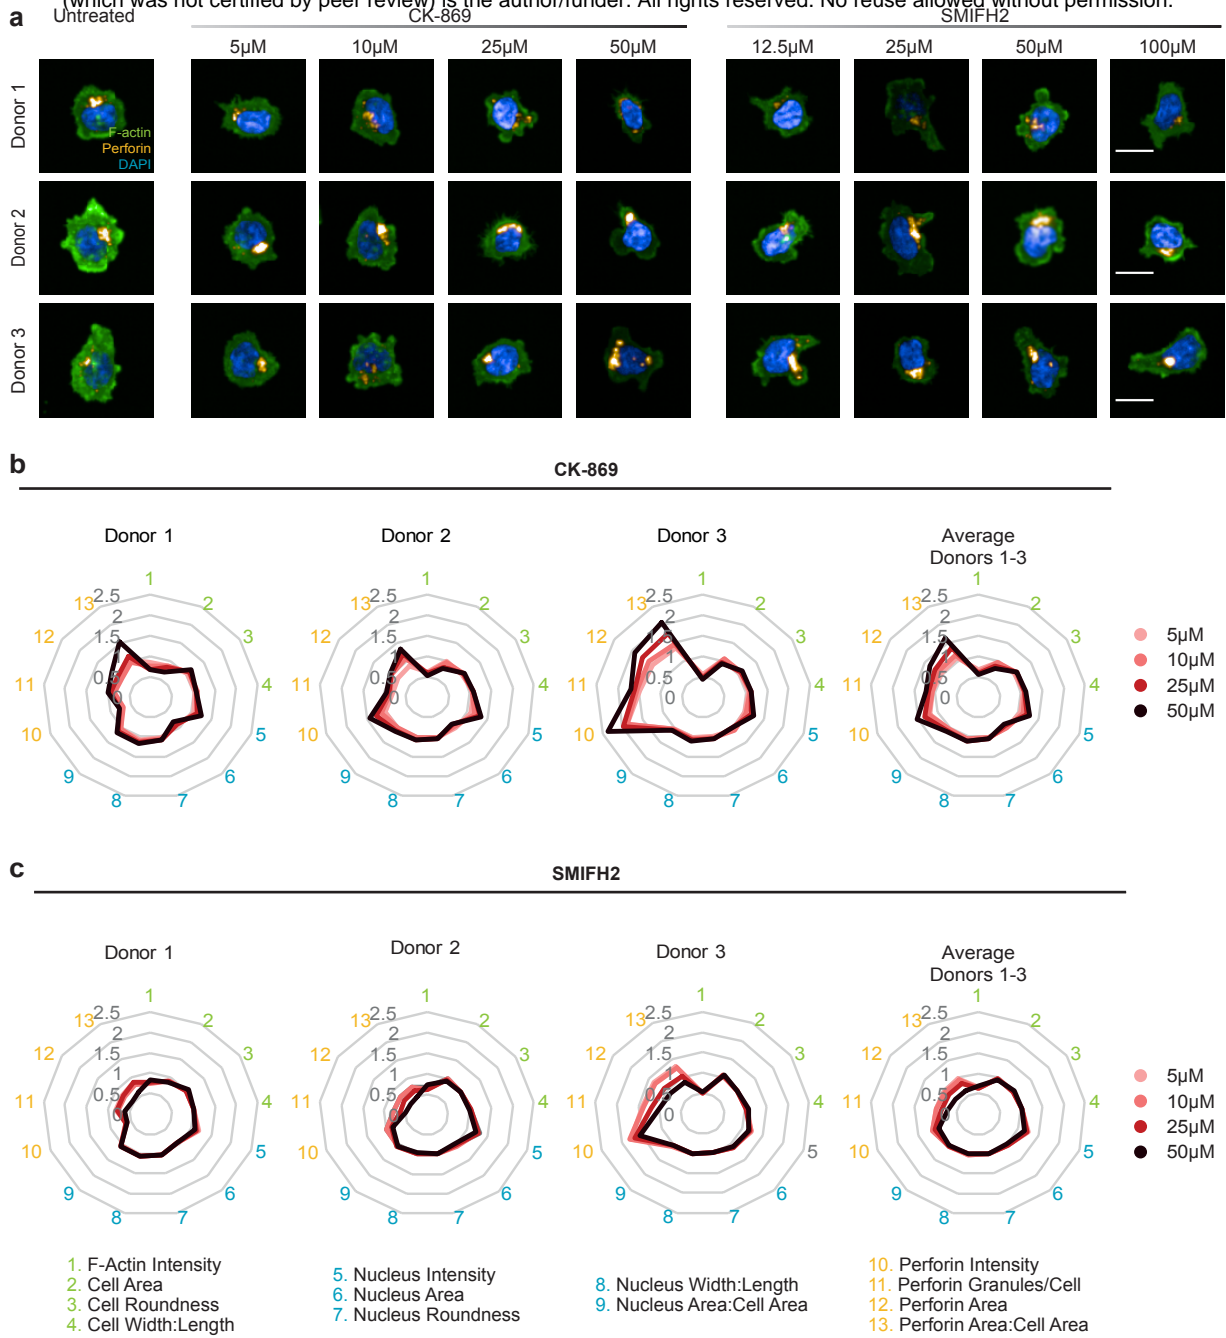

Fig. 4 | CK-869 and SMIFH2 treatments alter immunological synapse architecture and lytic granule polarization in primary NK cells.



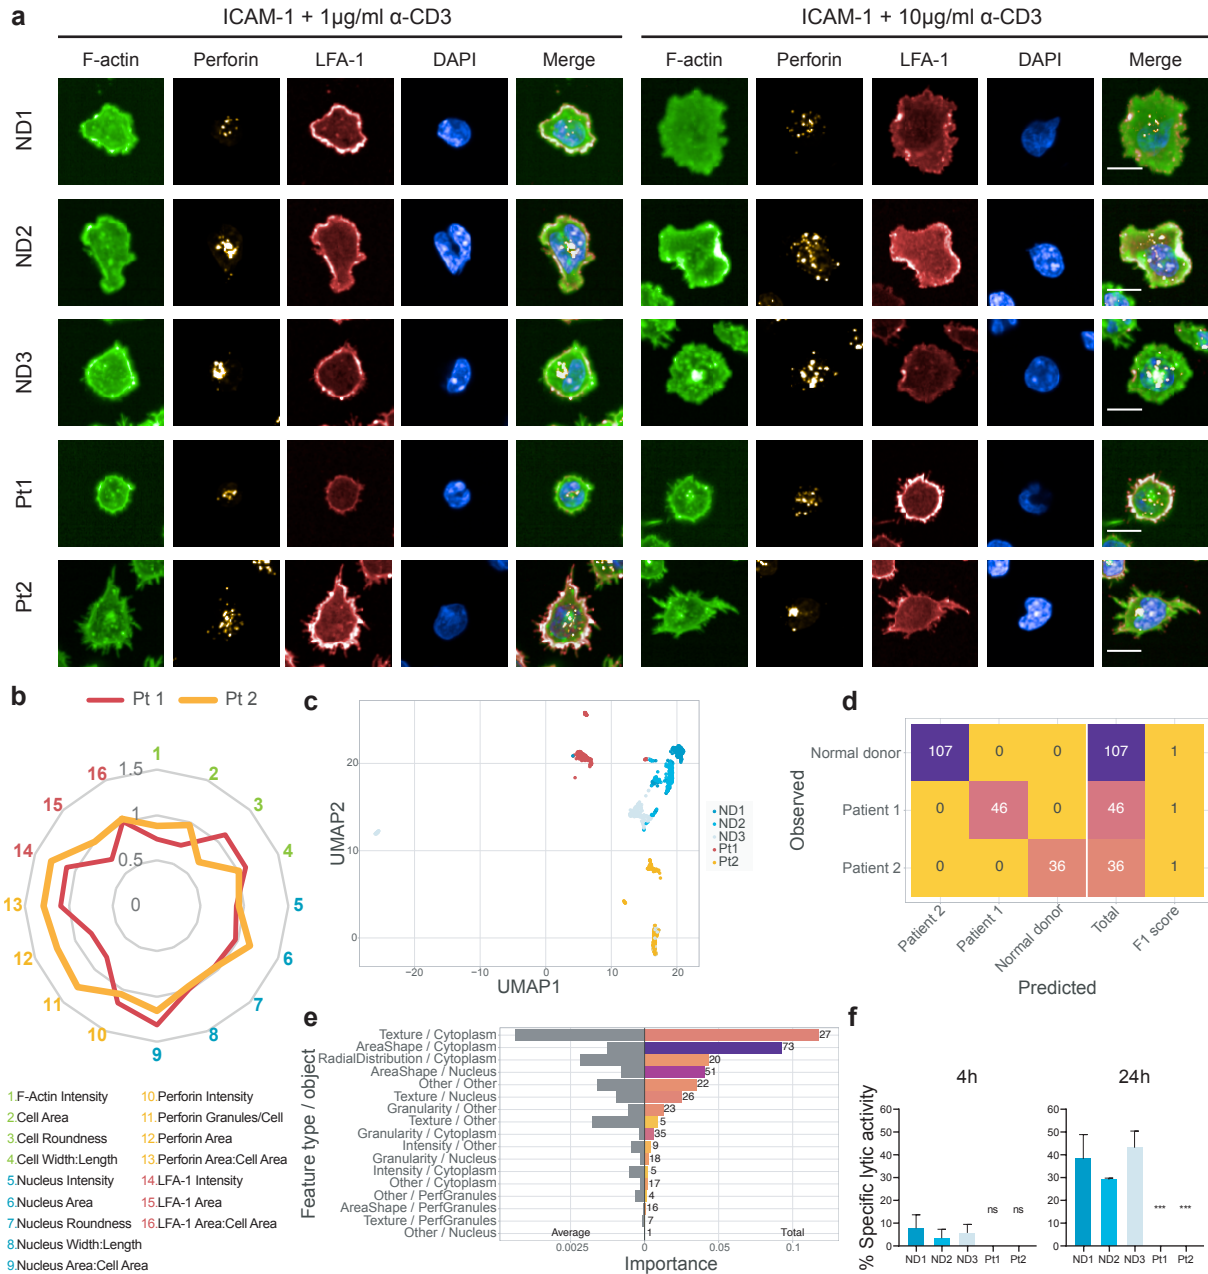

Fig. 5 | High content imaging of the immunological synapse in ARPC1B deficient CD8+ T cells.
